# Supplementary material for: A Comparison of Parent Reports, the Mental Synthesis Evaluation Checklist (MSEC) and the Autism Treatment Evaluation Checklist (ATEC), with the Childhood Autism Rating Scale (CARS)
Source: MDPI journal article supplement (doi:10.3390/pediatric16010016), 2024-03-11
Supplement: s1 [file s1]

## Supplementary Material

**Table S1. ATEC subscale 1: Speech/Language/Communication. The answer choices were very true (0 points), somewhat true (1 point), and not true (2 points).**

|                                                       |
|-------------------------------------------------------|
| 1. Knows own name                                     |
| 2. Responds to 'No' or 'Stop'                         |
| 3. Can follow some commands                           |
| 4. Can use one word at a time (No, Eat, Water, etc.)  |
| 5. Can use two words at a time (Don't want, Go home)  |
| 6. Can use three words at a time (Want more milk)     |
| 7. Knows 10 or more words                             |
| 8. Can use sentences with four or more words          |
| 9. Explains what he/she wants                         |
| 10. Asks meaningful questions                         |
| 11. Speech tends to be meaningful/relevant            |
| 12. Often uses several successive sentences           |
| 13. Carries on fairly good conversation               |
| 14. Has normal ability to communicate for his/her age |

**Table S2. ATEC subscale 2: Sociability. The answer choices were very true (0 points), somewhat true (1 point), and not true (2 points).**

|                                                      |
|------------------------------------------------------|
| 1. Seems to be in a shell – you cannot reach him/her |
| 2. Ignores other people                              |
| 3. Pays little or no attention when addressed        |
| 4. Uncooperative and resistant                       |
| 5. No eye contact                                    |
| 6. Prefers to be left alone                          |
| 7. Shows no affection                                |
| 8. Fails to greet parents                            |
| 9. Avoids contact with others                        |
| 10. Does not imitate                                 |
| 11. Dislikes being held/cuddled                      |
| 12. Does not share or show                           |
| 13. Does not wave 'bye bye'                          |
| 14. Disagreeable/not compliant                       |
| 15. Temper tantrums                                  |
| 16. Lacks friends/companions                         |
| 17. Rarely smiles                                    |
| 18. Insensitive to other's feelings                  |
| 19. Indifferent to being liked                       |
| 20. Indifferent if parent(s) leave                   |

**Table S3. ATEC subscale 3: Sensory/Cognitive awareness. The answer choices were very true (0 points), somewhat true (1 point), and not true (2 points).**

|                                    |
|------------------------------------|
| 1. Responds to own name            |
| 2. Responds to praise              |
| 3. Looks at people and animals     |
| 4. Looks at pictures (and T.V.)    |
| 5. Does drawing, coloring, art     |
| 6. Plays with toys appropriately   |
| 7. Appropriate facial expression   |
| 8. Understands stories on T.V.     |
| 9. Understands explanations        |
| 10. Aware of environment           |
| 11. Aware of danger                |
| 12. Shows imagination              |
| 13. Initiates activities           |
| 14. Dresses self                   |
| 15. Curious, interested            |
| 16. Venturesome—explores           |
| 17. “Tuned in”—Not spacey          |
| 18. Looks where others are looking |

**Table S4. ATEC subscale 4: Health/Physical/Behavior. The answer choices were not a problem (0 points), minor problem (1 point), moderate problem (2 points), and serious problem (3 points).**

|                                                    |
|----------------------------------------------------|
| 1. Bed-wetting                                     |
| 2. Wets pants/diapers                              |
| 3. Soils pants/diapers                             |
| 4. Diarrhea                                        |
| 5. Constipation                                    |
| 6. Sleep problems                                  |
| 7. Eats too much/too little                        |
| 8. Extremely limited diet                          |
| 9. Hyperactive                                     |
| 10. Lethargic                                      |
| 11. Hits or injures self                           |
| 12. Hits or injures others                         |
| 13. Destructive                                    |
| 14. Sound-sensitive                                |
| 15. Anxious/fearful                                |
| 16. Unhappy/crying                                 |
| 17. Seizures                                       |
| 18. Obsessive speech                               |
| 19. Rigid routines                                 |
| 20. Shouts or screams                              |
| 21. Demands sameness                               |
| 22. Often agitated                                 |
| 23. Not sensitive to pain                          |
| 24. “Hooked” or fixated on certain objects/topics  |
| 25. Repetitive movements (stimming, rocking, etc.) |

**Table S5. MSEC prepositional language comprehension subscale. The answer choices were very true (0 points), somewhat true (1 point), and not true (2 points).**

|                                                                                                                                                                        |
|------------------------------------------------------------------------------------------------------------------------------------------------------------------------|
| 1. Understands simple stories that are read aloud                                                                                                                      |
| 2. Understands elaborate fairy tales that are read aloud (i.e. stories describing FANTASY creatures)                                                                   |
| 3. Draws a VARIETY of RECOGNIZABLE images (objects, people, animals, etc.)                                                                                             |
| 4. Can draw a NOVEL image following YOUR description (e.g. a three-headed horse)                                                                                       |
| 5. Engages in a VARIETY of make-believe activities (such as: playing house, playing with toy soldiers, building forts and castles, etc.)                               |
| 6. Understands some simple modifiers (i.e. green apple vs. red apple or big apple vs. small apple)                                                                     |
| 7. Understands several modifiers in a sentence (i.e. small green apple)                                                                                                |
| 8. Understands size (can select the largest/smallest object out of a collection of objects)                                                                            |
| 9. Understands possessive pronouns (i.e. your apple vs. her apple)                                                                                                     |
| 10. Understands spatial prepositions (i.e. put the apple ON TOP of the box vs. INSIDE the box vs. BEHIND the box)                                                      |
| 11. Understands verb tenses (i.e. I will eat an apple vs. I ate an apple)                                                                                              |
| 12. Understands the change in meaning when the order of words is changed (i.e. understands the difference between 'a cat ate a mouse' vs. 'a mouse ate a cat')         |
| 13. Understands NUMBERS (i.e. two apples vs. three apples)                                                                                                             |
| 14. Can perform simple arithmetic: $2 + 3 = ?$                                                                                                                         |
| 15. Can add larger numbers: $7 + 6 = ?$                                                                                                                                |
| 16. Can perform simple subtraction: $3 - 2 = ?$                                                                                                                        |
| 17. Can subtract larger numbers: $15 - 7 = ?$                                                                                                                          |
| 18. Can perform simple multiplication: $2 \times 2 = ?$                                                                                                                |
| 19. Can multiply larger numbers: $6 \times 7 = ?$                                                                                                                      |
| 20. Understands explanations about people, objects, or situations beyond their immediate surroundings (e.g., "Mom is walking the dog," "The snow has turned to water") |

**Table S6: Exploratory Factor Analysis of MSEC complex language comprehension**

| <b>Items</b> | <b>Factor Loadings</b> | <b>Factor Score Correlations</b> | <b>Communality</b> | <b>Measure of Sampling Adequacy</b> |
|--------------|------------------------|----------------------------------|--------------------|-------------------------------------|
| X1.MSEC      | 0.87                   | 0.74                             | 0.75               | 0.87                                |
| X2.MSEC      | 0.85                   | 0.73                             | 0.73               | 0.85                                |
| X3.MSEC      | 0.90                   | 0.77                             | 0.82               | 0.93                                |
| X4.MSEC      | 0.86                   | 0.73                             | 0.73               | 0.92                                |
| X5.MSEC      | 0.85                   | 0.73                             | 0.72               | 0.93                                |
| X6.MSEC      | 0.82                   | 0.70                             | 0.68               | 0.90                                |
| X7.MSEC      | 0.89                   | 0.76                             | 0.79               | 0.93                                |
| X8.MSEC      | 0.88                   | 0.75                             | 0.77               | 0.92                                |
| X9.MSEC      | 0.93                   | 0.79                             | 0.86               | 0.95                                |
| X10.MSEC     | 0.92                   | 0.78                             | 0.84               | 0.95                                |
| X11.MSEC     | 0.91                   | 0.78                             | 0.84               | 0.88                                |
| X12.MSEC     | 0.90                   | 0.77                             | 0.80               | 0.88                                |
| X13.MSEC     | 0.94                   | 0.80                             | 0.87               | 0.96                                |
| X14.MSEC     | 0.82                   | 0.70                             | 0.68               | 0.83                                |
| X15.MSEC     | 0.77                   | 0.66                             | 0.59               | 0.86                                |
| X16.MSEC     | 0.80                   | 0.68                             | 0.64               | 0.90                                |
| X17.MSEC     | 0.72                   | 0.62                             | 0.52               | 0.91                                |
| X18.MSEC     | 0.66                   | 0.56                             | 0.43               | 0.87                                |
| X19.MSEC     | 0.51                   | 0.44                             | 0.26               | 0.84                                |
| X20.MSEC     | 0.91                   | 0.77                             | 0.82               | 0.95                                |

Kaiser–Meyer–Olkin Value = 0.9

Fit Based Upon Off-Diagonal Values = 0.95

Root Mean Square of the Residuals = 0.16

Sum of the Squared Loadings = 14.15

Proportion Variance = 71%

Cronbach's Alpha = 0.96 (95% CI: 0.84, 0.97)

**Table S7: Confirmatory Factor Analysis of MSEC complex language comprehension**

| Items    | Standardized Factor Loadings | P - Value |
|----------|------------------------------|-----------|
| X1.MSEC  | 0.73                         | <0.0001   |
| X2.MSEC  | 0.84                         | <0.0001   |
| X3.MSEC  | 0.66                         | <0.0001   |
| X4.MSEC  | 0.75                         | <0.0001   |
| X5.MSEC  | 0.76                         | <0.0001   |
| X6.MSEC  | 0.70                         | <0.0001   |
| X7.MSEC  | 0.82                         | <0.0001   |
| X8.MSEC  | 0.77                         | <0.0001   |
| X9.MSEC  | 0.81                         | <0.0001   |
| X10.MSEC | 0.81                         | <0.0001   |
| X11.MSEC | 0.85                         | <0.0001   |
| X12.MSEC | 0.83                         | <0.0001   |
| X13.MSEC | 0.74                         | <0.0001   |
| X14.MSEC | 0.72                         | <0.0001   |
| X15.MSEC | 0.65                         | <0.0001   |
| X16.MSEC | 0.72                         | <0.0001   |
| X17.MSEC | 0.62                         | <0.0001   |
| X18.MSEC | 0.47                         | <0.0001   |
| X19.MSEC | 0.30                         | 0.008     |
| X20.MSEC | 0.88                         | <0.0001   |

Root Mean Square Error of Approximation = 0.075 (90% CI: 0.059, 0.090)

Comparative Fit Index = 0.998

Tucker–Lewis Index = 0.986

Standardized Root Mean Square Residual = 0.124

**Table S8: Exploratory Factor Analysis of ATEC Subscale 1 Expressive Language**

| Items     | Factor Loadings | Factor Score Correlations | Communality | Measure of Sampling Adequacy |
|-----------|-----------------|---------------------------|-------------|------------------------------|
| X1.ATEC1  | 0.72            | 0.61                      | 0.52        | 0.88                         |
| X2.ATEC1  | 0.79            | 0.67                      | 0.62        | 0.84                         |
| X3.ATEC1  | 0.84            | 0.71                      | 0.70        | 0.88                         |
| X4.ATEC1  | 0.78            | 0.66                      | 0.61        | 0.88                         |
| X5.ATEC1  | 0.86            | 0.73                      | 0.74        | 0.87                         |
| X6.ATEC1  | 0.92            | 0.78                      | 0.85        | 0.86                         |
| X7.ATEC1  | 0.94            | 0.79                      | 0.88        | 0.95                         |
| X8.ATEC1  | 0.93            | 0.79                      | 0.87        | 0.91                         |
| X9.ATEC1  | 0.99            | 0.84                      | 0.99        | 0.92                         |
| X10.ATEC1 | 0.95            | 0.80                      | 0.90        | 0.95                         |
| X11.ATEC1 | 0.97            | 0.82                      | 0.94        | 0.96                         |
| X12.ATEC1 | 0.89            | 0.75                      | 0.79        | 0.92                         |
| X13.ATEC1 | 0.91            | 0.77                      | 0.83        | 0.92                         |
| X14.ATEC1 | 0.84            | 0.72                      | 0.71        | 0.92                         |

Kaiser–Meyer–Olkin Value = 0.91

Fit Based Upon Off-Diagonal Values = 0.97

Root Mean Square of the Residuals = 0.15

Sum of the Squared Loadings = 10.94

Proportion Variance = 78%

Cronbach's Alpha = 0.95 (95% CI: 0.93, 0.96)

**Table S9: Exploratory Factor Analysis of ATEC Subscale 2 Sociability**

| <b>Items</b>     | <b>Factor Loadings</b> | <b>Factor Score Correlations</b> | <b>Communality</b> | <b>Measure of Sampling Adequacy</b> |
|------------------|------------------------|----------------------------------|--------------------|-------------------------------------|
| X1.ATEC2         | 0.74                   | 0.59                             | 0.54               | 0.86                                |
| X2.ATEC2         | 0.86                   | 0.68                             | 0.74               | 0.91                                |
| X3.ATEC2         | 0.78                   | 0.62                             | 0.61               | 0.86                                |
| X4.ATEC2         | 0.58                   | 0.46                             | 0.34               | 0.78                                |
| X5.ATEC2         | 0.75                   | 0.59                             | 0.56               | 0.84                                |
| X6.ATEC2         | 0.82                   | 0.65                             | 0.68               | 0.84                                |
| X7.ATEC2         | 0.88                   | 0.70                             | 0.77               | 0.82                                |
| X8.ATEC2         | 0.81                   | 0.64                             | 0.65               | 0.83                                |
| X9.ATEC2         | 0.76                   | 0.60                             | 0.58               | 0.80                                |
| X10.ATEC2        | 0.77                   | 0.61                             | 0.59               | 0.86                                |
| X11.ATEC2        | 0.87                   | 0.69                             | 0.76               | 0.87                                |
| X12.ATEC2        | 0.84                   | 0.67                             | 0.70               | 0.85                                |
| X13.ATEC2        | 0.82                   | 0.65                             | 0.67               | 0.77                                |
| <b>X14.ATEC2</b> | <b>0.37</b>            | <b>0.30</b>                      | <b>0.14</b>        | <b>0.71</b>                         |
| <b>X15.ATEC2</b> | <b>0.30</b>            | <b>0.24</b>                      | <b>0.09</b>        | <b>0.59</b>                         |
| X16.ATEC2        | 0.89                   | 0.71                             | 0.79               | 0.89                                |
| X17.ATEC2        | 0.86                   | 0.68                             | 0.73               | 0.90                                |
| X18.ATEC2        | 0.89                   | 0.71                             | 0.79               | 0.88                                |
| X19.ATEC2        | 0.84                   | 0.67                             | 0.71               | 0.89                                |
| X20.ATEC2        | 0.79                   | 0.63                             | 0.62               | 0.84                                |

Kaiser–Meyer–Olkin Value = 0.84

Fit Based Upon Off-Diagonal Values = 0.91

Root Mean Square of the Residuals = 0.18

Sum of the Squared Loadings = 12.06

Proportion Variance = 60%

Cronbach's Alpha = 0.92 (95% CI: 0.89, 0.94)

**Table S10: Exploratory Factor Analysis of ATEC Subscale 2 Sociability after removing items 14 and 15**

| Items     | Factor Loadings | Factor Score Correlations | Communality | Measure of Sampling Adequacy |
|-----------|-----------------|---------------------------|-------------|------------------------------|
| X1.ATEC2  | 0.72            | 0.57                      | 0.52        | 0.85                         |
| X2.ATEC2  | 0.87            | 0.69                      | 0.76        | 0.91                         |
| X3.ATEC2  | 0.79            | 0.62                      | 0.62        | 0.87                         |
| X4.ATEC2  | 0.61            | 0.48                      | 0.37        | 0.70                         |
| X5.ATEC2  | 0.78            | 0.61                      | 0.60        | 0.84                         |
| X6.ATEC2  | 0.82            | 0.65                      | 0.68        | 0.83                         |
| X7.ATEC2  | 0.89            | 0.70                      | 0.80        | 0.81                         |
| X8.ATEC2  | 0.81            | 0.64                      | 0.66        | 0.84                         |
| X9.ATEC2  | 0.76            | 0.60                      | 0.58        | 0.80                         |
| X10.ATEC2 | 0.78            | 0.61                      | 0.61        | 0.86                         |
| X11.ATEC2 | 0.89            | 0.70                      | 0.78        | 0.88                         |
| X12.ATEC2 | 0.84            | 0.66                      | 0.70        | 0.83                         |
| X13.ATEC2 | 0.84            | 0.66                      | 0.70        | 0.76                         |
| X16.ATEC2 | 0.91            | 0.72                      | 0.84        | 0.90                         |
| X17.ATEC2 | 0.87            | 0.69                      | 0.76        | 0.90                         |
| X18.ATEC2 | 0.90            | 0.71                      | 0.80        | 0.87                         |
| X19.ATEC2 | 0.86            | 0.67                      | 0.73        | 0.90                         |
| X20.ATEC2 | 0.80            | 0.63                      | 0.64        | 0.84                         |

Kaiser–Meyer–Olkin Value = 0.85

Fit Based Upon Off-Diagonal Values = 0.95

Root Mean Square of the Residuals = 0.16

Sum of the Squared Loadings = 12.15

Proportion Variance = 67%

Cronbach's Alpha = 0.92 (95% CI: 0.90, 0.95)

**Table S11: Exploratory Factor Analysis of ATEC Subscale 3 Cognitive Awareness**

| Items     | Factor Loadings | Factor Score Correlations | Communality | Measure of Sampling Adequacy |
|-----------|-----------------|---------------------------|-------------|------------------------------|
| X1.ATEC3  | 0.75            | 0.56                      | 0.57        | 0.84                         |
| X2.ATEC3  | 0.81            | 0.61                      | 0.66        | 0.83                         |
| X3.ATEC3  | 0.75            | 0.56                      | 0.57        | 0.85                         |
| X4.ATEC3  | 0.63            | 0.47                      | 0.40        | 0.77                         |
| X5.ATEC3  | 0.80            | 0.60                      | 0.64        | 0.88                         |
| X6.ATEC3  | 0.92            | 0.69                      | 0.84        | 0.90                         |
| X7.ATEC3  | 0.97            | 0.73                      | 0.95        | 0.93                         |
| X8.ATEC3  | 0.83            | 0.62                      | 0.68        | 0.83                         |
| X9.ATEC3  | 0.87            | 0.66                      | 0.77        | 0.86                         |
| X10.ATEC3 | 0.94            | 0.70                      | 0.88        | 0.91                         |
| X11.ATEC3 | 0.88            | 0.66                      | 0.78        | 0.90                         |
| X12.ATEC3 | 0.93            | 0.70                      | 0.86        | 0.90                         |
| X13.ATEC3 | 0.87            | 0.65                      | 0.76        | 0.88                         |
| X14.ATEC3 | 0.73            | 0.55                      | 0.54        | 0.83                         |
| X15.ATEC3 | 0.72            | 0.54                      | 0.51        | 0.79                         |
| X16.ATEC3 | 0.68            | 0.51                      | 0.46        | 0.85                         |
| X17.ATEC3 | 0.74            | 0.56                      | 0.55        | 0.77                         |
| X18.ATEC3 | 0.93            | 0.69                      | 0.86        | 0.91                         |

Kaiser–Meyer–Olkin Value = 0.87

Fit Based Upon Off-Diagonal Values = 0.95

Root Mean Square of the Residuals = 0.16

Sum of the Squared Loadings = 12%

Proportion Variance = 68%

Cronbach's Alpha = 0.92 (95% CI: 0.89, 0.94)



**Table S12: Exploratory Factor Analysis of ATEC Subscale 4 Health**

| Items            | Factor Loadings | Factor Score Correlations | Communality | Measure of Sampling Adequacy |
|------------------|-----------------|---------------------------|-------------|------------------------------|
| X1.ATEC4         | 0.64            | 0.50                      | 0.40        | 0.74                         |
| X2.ATEC4         | 0.70            | 0.56                      | 0.50        | 0.74                         |
| X3.ATEC4         | 0.69            | 0.55                      | 0.48        | 0.70                         |
| <b>X4.ATEC4</b>  | <b>0.55</b>     | 0.43                      | 0.30        | 0.69                         |
| <b>X5.ATEC4</b>  | <b>0.44</b>     | 0.35                      | 0.19        | 0.48                         |
| X6.ATEC4         | 0.65            | 0.52                      | 0.42        | 0.77                         |
| X7.ATEC4         | 0.71            | 0.56                      | 0.51        | 0.64                         |
| X8.ATEC4         | 0.60            | 0.48                      | 0.36        | 0.60                         |
| X9.ATEC4         | 0.65            | 0.51                      | 0.42        | 0.63                         |
| <b>X10.ATEC4</b> | <b>0.17</b>     | 0.13                      | 0.03        | 0.35                         |
| X11.ATEC4        | 0.68            | 0.54                      | 0.47        | 0.69                         |
| X12.ATEC4        | 0.67            | 0.53                      | 0.45        | 0.77                         |
| X13.ATEC4        | 0.85            | 0.68                      | 0.73        | 0.78                         |
| X14.ATEC4        | 0.56            | 0.45                      | 0.32        | 0.74                         |
| <b>X15.ATEC4</b> | <b>0.43</b>     | 0.34                      | 0.18        | 0.54                         |
| <b>X16.ATEC4</b> | <b>0.23</b>     | 0.18                      | 0.05        | 0.30                         |
| <b>X17.ATEC4</b> | <b>0.33</b>     | 0.26                      | 0.11        | 0.53                         |
| X18.ATEC4        | 0.62            | 0.49                      | 0.39        | 0.77                         |
| X19.ATEC4        | 0.56            | 0.44                      | 0.31        | 0.61                         |
| X20.ATEC4        | 0.75            | 0.59                      | 0.56        | 0.73                         |
| X21.ATEC4        | 0.59            | 0.47                      | 0.35        | 0.57                         |
| X22.ATEC4        | 0.72            | 0.57                      | 0.52        | 0.75                         |
| X23.ATEC4        | 0.62            | 0.49                      | 0.39        | 0.62                         |
| X24.ATEC4        | 0.91            | 0.73                      | 0.84        | 0.83                         |
| X25.ATEC4        | 0.60            | 0.48                      | 0.36        | 0.66                         |

Kaiser–Meyer–Olkin Value = 0.68

Fit Based Upon Off-Diagonal Values = 0.76

Root Mean Square of the Residuals = 0.22

Sum of the Squared Loadings = 9.62

Proportion Variance = 38%

Cronbach's Alpha = 0.88 (95% CI: 0.84, 0.91)

**Table S13: Exploratory Factor Analysis of ATEC Subscale 4 Health after removing items 4, 5, 10, 15, 16, and 17**

| Items     | Factor Loadings | Factor Score Correlations | Communality | Measure of Sampling Adequacy |
|-----------|-----------------|---------------------------|-------------|------------------------------|
| X1.ATEC4  | 0.65            | 0.50                      | 0.43        | 0.76                         |
| X2.ATEC4  | 0.70            | 0.54                      | 0.50        | 0.73                         |
| X3.ATEC4  | 0.70            | 0.54                      | 0.50        | 0.75                         |
| X6.ATEC4  | 0.73            | 0.56                      | 0.54        | 0.83                         |
| X7.ATEC4  | 0.72            | 0.55                      | 0.52        | 0.69                         |
| X8.ATEC4  | 0.60            | 0.46                      | 0.36        | 0.57                         |
| X9.ATEC4  | 0.69            | 0.52                      | 0.47        | 0.70                         |
| X11.ATEC4 | 0.73            | 0.56                      | 0.54        | 0.79                         |
| X12.ATEC4 | 0.73            | 0.56                      | 0.53        | 0.82                         |
| X13.ATEC4 | 0.90            | 0.68                      | 0.80        | 0.84                         |
| X14.ATEC4 | 0.59            | 0.45                      | 0.35        | 0.68                         |
| X18.ATEC4 | 0.63            | 0.48                      | 0.40        | 0.63                         |
| X19.ATEC4 | 0.59            | 0.45                      | 0.35        | 0.67                         |
| X20.ATEC4 | 0.81            | 0.61                      | 0.65        | 0.78                         |
| X21.ATEC4 | 0.65            | 0.49                      | 0.42        | 0.70                         |
| X22.ATEC4 | 0.76            | 0.58                      | 0.58        | 0.78                         |
| X23.ATEC4 | 0.70            | 0.53                      | 0.49        | 0.73                         |
| X24.ATEC4 | 0.95            | 0.72                      | 0.90        | 0.85                         |
| X25.ATEC4 | 0.72            | 0.55                      | 0.52        | 0.75                         |

Root Mean Square of the Residuals = 0.21

Sum of the Squared Loadings = 9.84

Proportion Variance = 52%

Cronbach's Alpha = 0.88 (95% CI: 0.84, 0.92)

**Table S14: Confirmatory Factor Analysis of ATEC Subscale 1 Expressive Language**

| Items     | Standardized Factor Loadings | P-Value |
|-----------|------------------------------|---------|
| X1.ATEC1  | 0.40                         | <0.0001 |
| X2.ATEC1  | 0.54                         | 0.003   |
| X3.ATEC1  | 0.45                         | 0.003   |
| X4.ATEC1  | 0.58                         | 0.003   |
| X5.ATEC1  | 0.77                         | 0.001   |
| X6.ATEC1  | 0.84                         | 0.002   |
| X7.ATEC1  | 0.57                         | 0.001   |
| X8.ATEC1  | 0.85                         | 0.003   |
| X9.ATEC1  | 0.77                         | 0.002   |
| X10.ATEC1 | 0.82                         | 0.003   |
| X11.ATEC1 | 0.82                         | 0.002   |
| X12.ATEC1 | 0.76                         | 0.004   |
| X13.ATEC1 | 0.80                         | 0.004   |
| X14.ATEC1 | 0.70                         | 0.005   |

Root Mean Square Error of Approximation = 0.048 (90% CI: 0.00, 0.082)

Comparative Ft Index = 0.994

Tucker–Lewis Index = 0.993

Standardized Root Mean Square Residual = 0.118

**Table S15: Confirmatory Factor Analysis of ATEC Subscale 2 Sociability**

| Items            | Standardized Factor Loadings | P-Value |
|------------------|------------------------------|---------|
| X1.ATEC2         | 0.63                         | <0.0001 |
| X2.ATEC2         | 0.83                         | <0.0001 |
| X3.ATEC2         | 0.61                         | <0.0001 |
| X4.ATEC2         | 0.41                         | <0.0001 |
| X5.ATEC2         | 0.71                         | <0.0001 |
| X6.ATEC2         | 0.75                         | <0.0001 |
| X7.ATEC2         | 0.67                         | <0.0001 |
| X8.ATEC2         | 0.58                         | <0.0001 |
| X9.ATEC2         | 0.75                         | <0.0001 |
| X10.ATEC2        | 0.40                         | <0.0001 |
| X11.ATEC2        | 0.68                         | <0.0001 |
| X12.ATEC2        | 0.67                         | <0.0001 |
| X13.ATEC2        | 0.69                         | <0.0001 |
| <b>X14.ATEC2</b> | 0.16                         | 0.151   |
| <b>X15.ATEC2</b> | 0.09                         | 0.422   |
| X16.ATEC2        | 0.72                         | <0.0001 |
| X17.ATEC2        | 0.69                         | <0.0001 |
| X18.ATEC2        | 0.70                         | <0.0001 |
| X19.ATEC2        | 0.77                         | <0.0001 |
| X20.ATEC2        | 0.53                         | <0.0001 |

Root Mean Square Error of Approximation = 0.075 (90% CI: 0.055, 0.094)

Comparative Ft Index = 0.873

Tucker–Lewis Index = 0.858

Standardized Root Mean Square Residual = 0.094

**Table S16: Confirmatory Factor Analysis of ATEC Subscale 2 Sociability after removing items 14 and 15**

| Items     | Standardized Factor Loadings | P-Value |
|-----------|------------------------------|---------|
| X1.ATEC2  | 0.63                         | <0.0001 |
| X2.ATEC2  | 0.83                         | <0.0001 |
| X3.ATEC2  | 0.62                         | <0.0001 |
| X4.ATEC2  | 0.39                         | 0.0002  |
| X5.ATEC2  | 0.71                         | <0.0001 |
| X6.ATEC2  | 0.75                         | <0.0001 |
| X7.ATEC2  | 0.68                         | <0.0001 |
| X8.ATEC2  | 0.58                         | <0.0001 |
| X9.ATEC2  | 0.76                         | <0.0001 |
| X10.ATEC2 | 0.39                         | <0.0001 |
| X11.ATEC2 | 0.68                         | <0.0001 |
| X12.ATEC2 | 0.66                         | <0.0001 |
| X13.ATEC2 | 0.69                         | <0.0001 |
| X16.ATEC2 | 0.72                         | <0.0001 |
| X17.ATEC2 | 0.70                         | <0.0001 |
| X18.ATEC2 | 0.70                         | <0.0001 |
| X19.ATEC2 | 0.77                         | <0.0001 |
| X20.ATEC2 | 0.53                         | <0.0001 |

Root Mean Square Error of Approximation = 0.063 (90% CI: 0.036, 0.086)

Comparative Ft Index = 0.928

Tucker–Lewis Index = 0.918

Standardized Root Mean Square Residual = 0.08

**Table S17: Confirmatory Factor Analysis of ATEC Subscale 3 Sensory Awareness**

| Items     | Standardized Factor Loadings | P-Value |
|-----------|------------------------------|---------|
| X1.ATEC3  | 0.27                         | <0.0001 |
| X2.ATEC3  | 0.49                         | 0.001   |
| X3.ATEC3  | 0.71                         | 0.006   |
| X4.ATEC3  | 0.32                         | 0.075   |
| X5.ATEC3  | 0.47                         | 0.013   |
| X6.ATEC3  | 0.79                         | 0.006   |
| X7.ATEC3  | 0.54                         | 0.026   |
| X8.ATEC3  | 0.53                         | 0.003   |
| X9.ATEC3  | 0.52                         | 0.003   |
| X10.ATEC3 | 0.55                         | 0.004   |
| X11.ATEC3 | 0.66                         | 0.009   |
| X12.ATEC3 | 0.74                         | 0.007   |
| X13.ATEC3 | 0.77                         | 0.007   |
| X14.ATEC3 | 0.31                         | 0.007   |
| X15.ATEC3 | 0.66                         | 0.023   |
| X16.ATEC3 | 0.65                         | 0.033   |
| X17.ATEC3 | 0.40                         | 0.020   |
| X18.ATEC3 | 0.70                         | 0.008   |

Root Mean Square Error of Approximation = 0.053 (90% CI: 0.018, 0.078)

Comparative Ft Index = 0.98

Tucker–Lewis Index = 0.977

Standardized Root Mean Square Residual = 0.11

**Table S18: Confirmatory Factor Analysis of ATEC Subscale 4 Health**

| Items            | Standardized Factor Loadings | P-Value |
|------------------|------------------------------|---------|
| X1.ATEC4         | 0.43                         | <0.0001 |
| X2.ATEC4         | 0.47                         | <0.0001 |
| X3.ATEC4         | 0.35                         | <0.0001 |
| <b>X4.ATEC4</b>  | 0.13                         | 0.197   |
| <b>X5.ATEC4</b>  | 0.10                         | 0.418   |
| X6.ATEC4         | 0.53                         | 0.002   |
| X7.ATEC4         | 0.53                         | 0.002   |
| X8.ATEC4         | 0.64                         | 0.000   |
| X9.ATEC4         | 0.26                         | 0.047   |
| <b>X10.ATEC4</b> | 0.03                         | 0.817   |
| X11.ATEC4        | 0.43                         | 0.019   |
| X12.ATEC4        | 0.39                         | 0.017   |
| X13.ATEC4        | 0.34                         | 0.018   |
| X14.ATEC4        | 0.39                         | 0.019   |
| <b>X15.ATEC4</b> | 0.18                         | 0.194   |
| <b>X16.ATEC4</b> | 0.23                         | 0.041   |
| <b>X17.ATEC4</b> | 0.07                         | 0.157   |
| X18.ATEC4        | 0.42                         | 0.016   |
| X19.ATEC4        | 0.46                         | 0.007   |
| X20.ATEC4        | 0.48                         | 0.002   |
| X21.ATEC4        | 0.52                         | 0.002   |
| X22.ATEC4        | 0.32                         | 0.025   |
| X23.ATEC4        | 0.64                         | 0.000   |
| X24.ATEC4        | 0.60                         | 0.001   |
| X25.ATEC4        | 0.51                         | 0.001   |

Root Mean Square Error of Approximation = 0.060 (90% CI: 0.041, 0.077)

Comparative Ft Index = 0.887

Tucker–Lewis Index = 0.876

Standardized Root Mean Square Residual = 0.131

**Table S19: Confirmatory Factor Analysis of ATEC Subscale 4 Health after removing items 4, 5, 10, 15, 16, and 17**

| Items     | Standardized Factor Loadings | P-Value |
|-----------|------------------------------|---------|
| X1.ATEC4  | 0.42                         |         |
| X2.ATEC4  | 0.45                         | 0.00    |
| X3.ATEC4  | 0.34                         | 0.00    |
| X6.ATEC4  | 0.52                         | 0.00    |
| X7.ATEC4  | 0.52                         | 0.00    |
| X8.ATEC4  | 0.63                         | 0.00    |
| X9.ATEC4  | 0.28                         | 0.04    |
| X11.ATEC4 | 0.42                         | 0.02    |
| X12.ATEC4 | 0.39                         | 0.02    |
| X13.ATEC4 | 0.35                         | 0.02    |
| X14.ATEC4 | 0.38                         | 0.02    |
| X18.ATEC4 | 0.42                         | 0.02    |
| X19.ATEC4 | 0.47                         | 0.01    |
| X20.ATEC4 | 0.49                         | 0.00    |
| X21.ATEC4 | 0.52                         | 0.00    |
| X22.ATEC4 | 0.34                         | 0.02    |
| X23.ATEC4 | 0.64                         | 0.00    |
| X24.ATEC4 | 0.60                         | 0.00    |
| X25.ATEC4 | 0.51                         | 0.00    |

Root Mean Square Error of Approximation = 0.067 (90% CI: 0.043, 0.088)

Comparative Ft Index = 0.915

Tucker–Lewis Index = 0.905

Standardized Root Mean Square Residual = 0.133
